# Supplementary material for: Comparative Transcriptome Analysis of Short Fiber Mutants Ligon-Lintless 1 And 2 Reveals Common Mechanisms Pertinent to Fiber Elongation in Cotton (Gossypium hirsutum L.)
Source: PLoS One. 2014 Apr 18;9(4):e95554. doi: 10.1371/journal.pone.0095554 (PMC3991655; doi:10.1371/journal.pone.0095554)
Supplement: Table S3 — Expression levels of probes showing altered regulation in Li1, Li2 (field) and Li2 (greenhouse) as compared to the wild type (WT). (XLSX) [file pone.0095554.s003.xlsx]

## Sheet: Table S3
	Table S3. Expression levels of probes showing altered regulation in Li1, Li2 (field) and Li2 (greenhouse) as compared to the wild tpe (WT)
No.	Probes	Homologous Gene	Field Li1/WT	Field Li2/WT	Greenhouse Li1/WT	Chromasomal location in G raimondii
1	Ghi.7820.1.S1_s_at	18S ribosomal RNA (mitochondria)	3.70214	4.85771	2.13948	Gorai.013G213000
2	GraAffx.32667.2.A1_s_at	18S rRNA (mitochondrial)	4.1323	5.12918	2.02087	Gorai.013G213000
3	Ghi.581.1.S1_at	2-oxoglutarate (2OG) and Fe(II)-dependent oxygenase superfamily protein isoform 1	0.0753995	0.0593595	0.0460107	Gorai.002G036400
4	GhiAffx.6286.1.S1_at	4-coumarate:CoA ligase (4CL)	0.240412	0.314948	0.197942	Gorai.009G005900
5	Gra.1375.1.A1_at	actin 5 (ACT5)	0.353921	0.460502	0.408046	Gorai.013G022400
6	GhiAffx.33535.1.S1_at	actin depolymerizing factor 5 (ADF5)	0.144605	0.455448	0.125221	Gorai.008G035300
7	Ghi.1209.1.S1_at	ARM repeat superfamily protein	0.484965	0.492087	0.208303	Gorai.010G025700
8	Ghi.8448.1.S1_x_at	beta-tubulin 1 (BTub1)	0.216789	0.207571	0.136527	Gorai.004G211800
9	GraAffx.8388.1.S1_s_at	cellulose synthase-like protein	0.392563	0.453354	0.25927	Gorai.009G066500
10	Ghi.3452.1.S1_s_at	cellulose synthase-like protein	0.396892	0.484963	0.454822	Gorai.009G222300
11	GhiAffx.23257.1.S1_s_at	cellulose synthase-like protein	0.439019	0.486036	0.246619	Gorai.009G066500
12	Ghi.2235.1.A1_s_at	chaperonin-60kD, ch60	2.12434	2.28883	2.52343	Gorai.007G151700
13	Ghi.1908.1.S1_s_at	cofactor assembly	0.296833	0.399612	0.296907	Gorai.007G003100
14	Ghi.8534.1.A1_s_at	cyclin-U2-1	0.278102	0.277003	0.236296	Gorai.004G164400
15	Ghi.2840.3.S1_s_at	cysteine proteinase	2.02664	2.71621	2.37035	Gorai.013G224100
16	GhiAffx.39816.1.S1_s_at	cytidine deaminase 1	0.457858	0.226292	0.370853	Gorai.013G228000
17	GhiAffx.39795.1.S1_at	EF hand calcium-binding protein family	0.191222	0.269388	0.197173	Gorai.008G075000
18	Ghi.68.1.A1_s_at	fasciclin-like arabinogalactan protein 1	0.351006	0.14505	0.207577	Gorai.008G155400
19	Ghi.5801.1.A1_at	GDSL esterase/lipase	0.179644	0.367319	0.132929	Gorai.011G103900
20	Ghi.5444.1.S1_at	gibberellin 20-oxidase	0.294742	0.448559	0.186635	Gorai.004G149700
21	GhiAffx.11707.1.A1_at	gland development related protein 23-like	0.354991	0.427521	0.411076	Gorai.004G208300
22	GhiAffx.8010.1.S1_at	glycolipid transfer protein	0.134956	0.114556	0.107106	Gorai.005G138500
23	GhiAffx.19944.1.S1_at	glycoprotein membrane precursor GPI-anchored	0.380702	0.425228	0.357178	Gorai.005G041200
24	Ghi.5081.1.S1_s_at	glyoxal oxidase-related protein	0.176895	0.468285	0.104959	Gorai.002G125000
25	Ghi.632.1.S1_at	GroES-like zinc-binding alcohol dehydrogenase family protein	0.0321596	0.0549194	0.0253939	Gorai.002G066100
26	Gra.2833.1.S1_at	homeodomain-leucine zipper protein 56 (HDL56)	2.03245	3.85647	2.93074	Gorai.003G041500
27	Ghi.5889.1.A1_x_at	HXXXD-type acyl-transferase family protein	0.160504	0.367654	0.264515	Gorai.012G006700
28	Ghi.5889.2.S1_s_at	HXXXD-type acyl-transferase family protein	0.235102	0.437009	0.245516	Gorai.012G006600
29	Ghi.7819.1.A1_at	hydrolase, alpha/beta fold family protein	0.195308	0.320666	0.167361	Gorai.011G272800
30	Ghi.5515.1.A1_s_at	iron-binding protein (Fer1)	0.436586	0.25507	0.350592	Gorai.006G184700
31	GraAffx.1241.1.S1_s_at	leucine-rich receptor-like protein kinase (LRPKm1)	0.420748	0.301521	0.42777	Gorai.009G166500
32	Ghi.6301.1.S1_s_at	lung seven transmembrane receptor family protein	0.4432	0.428789	0.372074	Gorai.007G019200
33	Ghi.6548.1.S1_s_at	MAP kinase-like protein	0.315866	0.309418	0.175533	Gorai.002G096100
34	GhiAffx.29423.1.S1_s_at	MAR-binding protein	2.32113	2.21666	2.18921	Gorai.004G245100
35	Ghi.5146.1.A1_x_at	NADP-dependent malic enzyme	0.487071	0.375761	0.326761	Gorai.009G048600
36	GhiAffx.6438.1.S1_at	nodulin family protein	0.164729	0.139252	0.198498	Gorai.007G034700
37	GhiAffx.21685.1.S1_at	nuclear transport factor 2 (NTF2)	0.183912	0.220254	0.125808	Gorai.013G010700
38	Ghi.7430.2.S1_s_at	octicosapeptide/Phox/Bem1p (PB1) domain-containing protein / tetratricopeptide repeat (TPR)-containing protein	0.406845	0.491026	0.154718	Gorai.013G214100
39	Ghi.1352.1.S1_s_at	O-fucosyltransferase family protein isoform 1	0.435316	0.309576	0.308819	Gorai.003G038000
40	Ghi.10656.1.S1_s_at	photosystem I subunit PsaD (PSAD)	0.282941	0.361913	0.411069	Gorai.005G042000
41	GhiAffx.51155.1.S1_s_at	PIP protein (PIP2;7)	0.107398	0.218904	0.14274	Gorai.011G098100
42	Ghi.5186.1.A1_at	plant invertase/pectin methylesterase inhibitor superfamily	0.256809	0.377683	0.098075	Gorai.001G018200
43	GhiAffx.33585.1.S1_at	plant invertase/pectin methylesterase inhibitor superfamily	0.289885	0.315282	0.328698	Gorai.002G031100
44	Ghi.8118.1.S1_at	putative carboxyl-terminal proteinase	0.276792	0.208665	0.186577	Gorai.005G180300
45	GraAffx.34131.2.S1_x_at	pyridoxal phosphate phosphatase (PHOSPHO2)	0.0671811	0.0839701	0.0458793	Gorai.011G067300
46	Ghi.4013.2.S1_at	root iron transporter protein IRT1	0.0283126	0.216254	0.0395844	Gorai.011G049700
47	GhiAffx.22857.1.A1_at	rps16 (chloroplast)	2.49443	2.79643	2.16913	Gorai.001G180700
48	GhiAffx.43008.1.S1_at	SAUR family protein	0.253267	0.123485	0.0726405	Gorai.001G017600
49	GhiAffx.24789.1.S1_at	SAUR family protein (SAUR54)	0.195155	0.398018	0.237347	Gorai.N011800.1
50	Ghi.5484.1.S1_s_at	SKU5-like 5 protein	0.157872	0.294435	0.242734	Gorai.009G189900
51	Ghi.978.1.S1_at	tetratricopeptide repeat-like superfamily protein isoform 1	0.182393	0.365109	0.18776	Gorai.013G142800
52	GhiAffx.44664.1.S1_at	thiosulfate sulfurtransferase	0.356684	0.332981	0.395638	Gorai.007G049000
53	GhiAffx.53295.1.A1_at	UDP-glucuronosyl and UDP-glucosyl transferase	2.46338	3.64873	3.07101	Gorai.008G273200
54	Ghi.9654.1.S1_s_at	UDP-glycosyltransferase UGT73C14	2.51971	4.3297	2.68217	Gorai.008G273200
55	Ghi.3235.1.A1_at	UDP-glycosyltransferase UGT73C14	3.72834	9.40434	4.27661	Gorai.009G411800
56	Ghi.10822.1.S1_at	xyloglucan endotransglucosylase/hydrolase (XTH2)	0.41099	0.435098	0.230111	Gorai.003G033600
57	Ghi.4013.1.A1_at	zinc transporter 10 precursor	0.0499878	0.2	0.0450321	Gorai.011G049700
58	Ghi.10311.1.S1_s_at	SNARE protein Syntaxin 1 and related proteins	0.358892	0.407427	0.208531	Gorai.006G148600
59	Ghi.4533.1.A1_x_at	SNARE protein Syntaxin 1 and related proteins	0.382766	0.391267	0.334331	Gorai.006G148600
60	GhiAffx.7289.1.S1_at	SNARE protein Syntaxin 1 and related proteins	0.357832	0.337611	0.245977	Gorai.006G148600
61	Ghi.7279.1.S1_at	ABC transporter	0.307728	0.337368	0.165768	Gorai.009G022400
62	GhiAffx.58403.1.S1_at	G1/S-specific Cyclin D	0.176511	0.151053	0.139306	Gorai.005G185600
63	GhiAffx.23478.1.S1_at	NTKL-BINDING PROTEIN 1 (PTHR21470)	0.426785	0.486076	0.27506	Gorai.001G120300
64	GhiAffx.4465.1.S1_s_at	F-BOX/LEUCINE RICH REPEAT PROTEIN (PTHR23125)	0.301507	0.34656	0.305783	Gorai.009G049800
65	GhiAffx.44162.1.S1_s_at	Extracellular protein with conserved cysteines (KOG:4735)	0.381493	0.406687	0.430875	Gorai.007G359700
66	Ghi.8451.1.S1_s_at	integral to membrane (GO:0016021); Stress responsive protein (KOG:1773),	0.123179	0.209294	0.168575	Gorai.001G148000
67	Ghi.3429.3.A1_at	Domain of unknown function (DUF2828)	2.55133	3.61965	2.29658	Gorai.003G179100
68	Ghi.354.1.S1_at	Uncharacterised protein family (UPF0041)	2.33012	2.67179	4.25663	Gorai.010G185900
69	GraAffx.5570.1.A1_s_at	Protein of unknown function (DUF1645)	0.277158	0.429539	0.182122	Gorai.007G305200
70	Ghi.7321.1.S1_at	Protein of unknown function (DUF1295)	0.357389	0.463039	0.247179	Gorai.008G132900
71	Ghi.7402.1.S1_at	Protein of unknown function, DUF642	0.182173	0.211079	0.0759695	Gorai.011G080100
72	GhiAffx.3083.7.S1_x_at	Protein of unknown function, DUF538	2.84851	2.03963	3.10401	Gorai.007G019900
73	Ghi.1438.1.S1_s_at	no functional annotations	0.385344	0.495805	0.244774	Gorai.011G098500
74	Ghi.4464.1.A1_at	no functional annotations	0.325526	0.43663	0.302151	Gorai.007G307600
75	Ghi.734.1.S1_at	no functional annotations	0.172386	0.43255	0.236316	Gorai.008G290600
76	Ghi.884.1.S1_at	no functional annotations	0.372175	0.103182	0.146479	Gorai.007G052300
77	GhiAffx.11775.1.S1_at	no functional annotations	2.47786	3.21606	3.11977	Gorai.009G341800
78	GhiAffx.19944.1.S1_at	no functional annotations	0.380702	0.425228	0.357178	Gorai.005G041200
79	GhiAffx.21560.1.A1_a_at	no functional annotations	0.286884	0.376349	0.28221	Gorai.013G002100
80	GhiAffx.25417.1.A1_at	no functional annotations	0.323595	0.448607	0.344441	Gorai.009G146100
81	GhiAffx.28972.1.S1_at	no functional annotations	11.0066	4.49739	6.65582	Gorai.007G159800
82	GhiAffx.40674.1.S1_s_at	no functional annotations	0.362706	0.464296	0.185259	Gorai.006G035000
83	GhiAffx.46348.1.S1_at	no functional annotations	0.267815	0.308397	0.231254	Gorai.013G026900
84	GhiAffx.7736.1.A1_at	no functional annotations	2.22801	2.1016	2.46746	Gorai.011G257200
85	GhiAffx.7965.1.A1_at	no functional annotations	0.460187	0.375426	0.329921	Gorai.007G155900
86	Ghi.6102.1.S1_at	no functional annotations	0.364184	0.25906	0.258845	No Match
87	Ghi.7210.1.S1_x_at	no functional annotations	0.0902546	0.050431	0.0752252	No Match
88	Ghi.955.1.S1_at	no functional annotations	0.135035	0.199054	0.0581434	No Match
