# Supplementary material for: Comparative Transcriptome Analysis of Short Fiber Mutants Ligon-Lintless 1 And 2 Reveals Common Mechanisms Pertinent to Fiber Elongation in Cotton (Gossypium hirsutum L.)
Source: PLoS One. 2014 Apr 18;9(4):e95554. doi: 10.1371/journal.pone.0095554 (PMC3991655; doi:10.1371/journal.pone.0095554)
Supplement: Table S4 — Comparison between RT-qPCR and microarray under different growing environments. (XLSX) [file pone.0095554.s004.xlsx]

## Sheet: Table S4
Table S4. Comparison between RT-qPCR and microarray under different growing environments
			Li1 Field				Li2 Field				Li2 Greenhouse
			Microarry		RT-qPCR		Microarry		RT-qPCR		Microarry		RT-qPCR
Class	Probes	Annotation	Li1/Wt	p-value	Li1/Wt	p-value	Li2/Wt	p-value	Li2/Wt	p-value	Li2/Wt	p-value	Li2/Wt	p-value
	1. Ghi.581.1.S1_at	2-oxoglutarate (2OG) and Fe(II)-dependent oxygenase superfamily protein isoform 1	0.08	0	0.214475	1.06091e-05	0.06	0	0.0763024	8.20905e-06	0.05	0	0.143061	2.20569e-06
	2. GhiAffx.39795.1.S1_at	EF hand calcium-binding protein family	0.19	0	0.0725612	9.38421e-08	0.27	0	0.230729	3.11287e-05	0.2	1.47986e-206	0.223862	9.22175e-06
Commonly	3. Ghi.68.1.A1_s_at	fasciclin-like arabinogalactan protein 1	0.35	0	0.145961	0.0013806	0.15	0	0.0156556	0.000654766	0.21	4.83623e-201	0.0580067	0.000504287
regulated.	4. Ghi.5444.1.S1_at	gibberellin 20-oxidase	0.29	0	0.183478	2.2692e-08	0.45	0	0.240945	3.56441e-06	0.19	0	0.162952	0.000203319
	5. GhiAffx.51155.1.S1_s_at	PIP protein (PIP2;7)	0.11	0	0.0833967	1.16744e-07	0.22	0	0.0891927	6.82229e-07	0.14	0	0.130886	0.00024191
	6. GhiAffx.43008.1.S1_at	SAUR family protein	0.25	0	0.131202	1.95493e-05	0.12	0	0.0620878	1.23454e-05	0.07	0	0.047363	2.962e-05
Regulated	7. Ghi.395.1.S1_s_at	aquaporin nip2-1	0.253698	0	0.147825	8.90581e-07	1.04134	0.208969	1.21063	0.521771	0.784795	4.44089e-15	0.567786	9.03437e-05
by mutants	8. Ghi.10640.1.S1_s_at	heat shock	1.41824	4.69929e-05	1.41509	0.0168778	0.392627	7.64636e-17	0.245032	0.00128287	0.0679804	0	0.38443	0.0193331
	9. GhiAffx.11032.1.S1_at	subtilisin-like serine endopeptidase	0.405365	0	0.527319	0.00015718	0.240011	0	0.338726	7.03504e-05	1.34724	0.225981	1.84462	0.0147122
Regulated	10. GhiAffx.5687.1.S1_at	photosystem i p700apoprotein a1	1.06446	1.83061e-06	1.53757	0.00716143	1.17046	0.000242046	0.764815	0.154645	0.103771	0	0.397905	1.93992e-05
by environment	11. Ghi.8364.1.A1_at	indole-3-acetic acid-induced protein	11.9109	0	9.47891	0.000177823	2	7.89801e-25	3.54909	0.144599	1.42793	0.260911	1.56695	0.078221
	12. Gra.3079.2.A1_s_at	cytochrome p450	0.733843	0.00846716	0.596282	0.336147	7.13497	0	62.1932	0.00185401	0.61294	0	0.746758	0.108087
Regulated by mutants	13. Ghi.7449.1.S1_at	flavonol sulfotransferase-like protein	1.15539	0	0.842516	0.0621338	6.50794	0	6.93565	0.0406047	1.12546	0.736998	1.90988	0.000935264
& environment.	14. Ghi.5464.1.A1_at	2-isopropylmalate synthase	0.819908	0.000621772	0.882158	0.071669	0.537035	0	0.586194	0.000291939	39.6223	0	4.26675	0.000247256
Microarray (p-value < 0.05, Bonferroni-corrected) and RT-qPCR (p-value <0.05, two-tailed paired t-test) data at ≥ 2-fold difference in transcript abundance are shown in boldface.
